# Supplementary material for: Fabrication of Multi-Material Pneumatic Actuators and Microactuators Using Stereolithography
Source: MDPI journal article supplement (doi:10.3390/mi14020244), 2023-01-18
Supplement: s1 [file s1]

## Supplementary Materials

# Fabrication of Multi-Material Pneumatic Actuators and Microactuators Using Stereolithography

Qingchuan Song, Yunong Chen, Peilong Hou, Pang Zhu, Dorothea Helmer, Frederik Kotz-Helmer \* and Bastian E. Rapp

**Table S1.** Printer resolution and 3D part resolution of extrusion-based 3D printing methods (FDM, DIW, Polyjet) and stereolithography.

| 3D Printing Technology         | Printer Resolution             | 3D Part Resolution | Source |
|--------------------------------|--------------------------------|--------------------|--------|
| FDM                            | 0.4 mm                         | 5 mm               | [1]    |
| DIW                            | 0.1 mm                         | 1.2 mm             | [2]    |
| Polyjet                        | 0.016 mm                       | >0.75 mm           | [3]    |
| Stereolithography (this paper) | 0.039 mm (xy)/<br>0.010 mm (z) | ~0.200 mm          | -      |

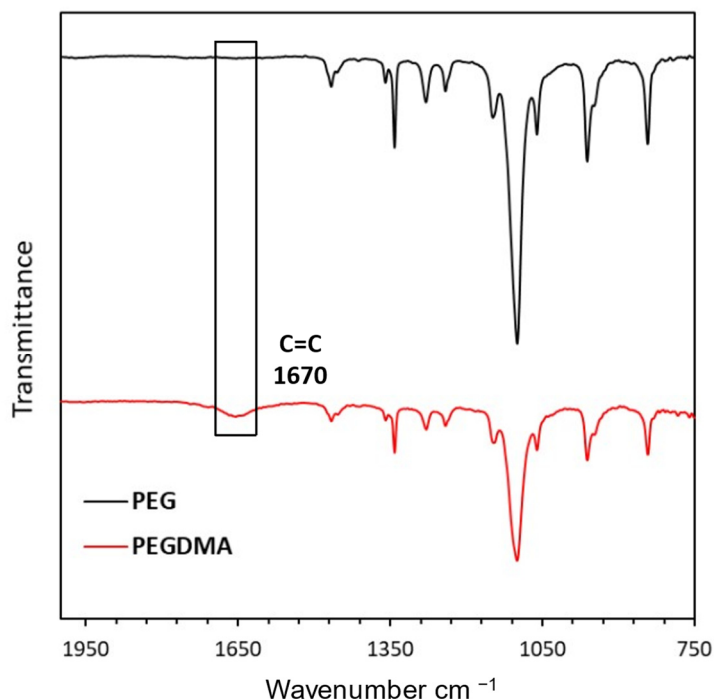

**Figure S1.** FTIR spectra of PEG10k (black) and PEGDMA10k (red). The peak at 1630–1730 cm<sup>-1</sup> indicates the stretch of C=C bonds and C=O bonds, which were expected due to the introduction of the methacrylic group.

**Video S1:** Compression process of a multi-material lattice.

**Video S2:** Inflation process of a multi-material balloon.

**Video S3:** Bounce behavior of an inflated multi-material balloon.

**Video S4:** Assembly of multi-material actuators.

**Video S5:** Activation of fin-like microactuators.

## References

1. Chacón, J.M.; Caminero, M.A.; García-Plaza, E.; Núñez, P.J. Additive Manufacturing of PLA Structures Using Fused Deposition Modelling: Effect of Process Parameters on Mechanical Properties and Their Optimal Selection. *Materials & Design* **2017**, *124*, 143–157.
2. Guo, S.-Z.; Qiu, K.; Meng, F.; Park, S.H.; McAlpine, M.C. 3D Printed Stretchable Tactile Sensors. *Adv. Mater.* **2017**, *29*, 1701218.
3. Ong, L.J.Y.; Islam, A.; DasGupta, R.; Iyer, N.G.; Leo, H.L.; Toh, Y.-C. A 3D Printed Microfluidic Perfusion Device for Multicellular Spheroid Cultures. *Biofabrication* **2017**, *9*, 045005.
