# Supplementary material for: Fabrication of Multi-Material Pneumatic Actuators and Microactuators Using Stereolithography
Source: Micromachines (Basel). 2023 Jan 18;14(2):244. doi: 10.3390/mi14020244 (PMC9966499; doi:10.3390/mi14020244)
Supplement: Supplementary file 1 [file micromachines-14-00244-s001.zip]

Archive with 6 entries (6 files):
- micromachines-2125401-supplementary.pdf
- Supplementary Video S1.mp4
- Supplementary Video S2.mp4
- Supplementary Video S3.mp4
- Supplementary Video S4.mp4
- Supplementary Video S5.mp4
